# Supplementary material for: Using ELP Repeats as a Scaffold for De Novo Construction of Gadolinium-Binding Domains within Multifunctional Recombinant Proteins for Targeted Delivery of Gadolinium to Tumour Cells
Source: MDPI journal article supplement (doi:10.3390/ijms23063297), 2022-03-18
Supplement: s1 [file s1]

Table S1

| Name                                     | Sequence<br>5'→3'                                           | Size | Restriction<br>site |
|------------------------------------------|-------------------------------------------------------------|------|---------------------|
| <b>E(Y)-for</b>                          | gtcccaggctatggcgtgccagggttctggt                             | 30   |                     |
| <b>E(Y)-rev</b>                          | tggcacgccatagcctgggac                                       | 21   |                     |
| <b>M</b>                                 | gacaaagacggtgacggcaccatcaccacaaagaactg                      | 39   |                     |
| <b>EME</b>                               | acccggaaccagttctttggtggtgatggtgccgtcaccgtctttgtcaccagaacc   | 57   |                     |
| <b>Enew</b>                              | gttcgggttctggtgtgccaggcagtggtgtacctgggtcaggcggttcgggttctggt | 60   |                     |
| <b>E2new</b>                             | cggaacgcctgaccaggtacaccactgcctggcacaccaga                   | 42   |                     |
| <b>M*</b>                                | gacaaagacggtgacggcacgatcacgacgaaggagtta                     | 39   |                     |
| <b>EME*</b>                              | taactccttcgtcgtgatcgtgccgtcaccgtctttgtcaccagaacc            | 48   |                     |
| <b>Bgl-E(Y)</b>                          | gcatcagatctgtcccaggctatggcg                                 | 27   | BglII               |
| <b>Bam-M*</b>                            | gcatcggatcctaactccttcgtcgtgatcgt                            | 32   | BamHI               |
| <b>End-for</b>                           | gatctgttcgggttctggtgtgcctggtagcggtg                         | 36   |                     |
| <b>End-rev</b>                           | gatccaccgctaccaggcacaccagaacccggaaca                        | 36   |                     |
| <b>pJET1.2 forward sequencing primer</b> | cgactcactataggagagcggc                                      | 23   |                     |
| <b>pJET1.2 reverse sequencing primer</b> | aagaacatcgattttccatggcag                                    | 24   |                     |
| <b>F3-1-dir</b>                          | aaagacgagccgcagcgtcgtccgcccgcctcagcgccaaaccggcaccgccaaaacc  | 60   |                     |
| <b>F3-1-rev</b>                          | tttttggtggcgtttttcggctttggctcgggttttggcggtgccggtttggcgtgag  | 63   |                     |
| <b>FL-dir</b>                            | ccgaaaaaagcggcagccaaaaaagggtggtggtgtctggtggcgcggtctctgg     | 56   |                     |
| <b>Bam-L-rev</b>                         | gcatcggatccaccaccagagccgcc                                  | 26   | BamHI               |
| <b>R1-for</b>                            | gcggttaccggctcgtggtgatagcggttctgg                           | 32   |                     |
| <b>R1-rev</b>                            | accagagccgctgcccgaaccagaaccgctatcacc                        | 36   |                     |
| <b>Bgl-R1-for</b>                        | gcatcagatctgcggttaccggtcg                                   | 25   | BglII               |

|                     |                                              |    |       |
|---------------------|----------------------------------------------|----|-------|
| <b>Bam-R1-rev</b>   | gcactggatccaccagagccgctgc                    | 25 | BamHI |
| <b>W4 seq rev</b>   | ggacacgctgaacttggtg                          | 19 |       |
| <b>Bgl-F-for</b>    | gcatcagatctaaagacgagccgcag                   | 26 | BglII |
| <b>Eco-W4-rev</b>   | gcactagaattcaccgctaccaggc                    | 25 | EcoRI |
| <b>Exp1 for</b>     | acaacaccacaacaccatcatcatcatcatgg             | 35 |       |
| <b>Exp2 for</b>     | accaccccacaacaccatcatcatcatcatgg             | 35 |       |
| <b>Exp rev</b>      | catatgtatatctccttcttaaagttaaacaaaattatttctag | 44 |       |
| <b>Exp1 seq for</b> | catatgacaacaccacaacacc                       | 22 |       |
| <b>Exp2 seq for</b> | gaccaccccacaacacc                            | 17 |       |
| <b>Eco-F-for</b>    | gcatcgaattcaaagacgagccgcag                   | 26 | EcoRI |
| <b>Nco-F-for</b>    | agcactccatgggtaaagacgagccgcagc               | 30 | NcoI  |
| <b>Nco-E-rev</b>    | agcacaccatggaaccgctaccaggcacacc              | 31 | NcoI  |
